# Supplementary material for: G3BP1, G3BP2 and CAPRIN1 Are Required for Translation of Interferon Stimulated mRNAs and Are Targeted by a Dengue Virus Non-coding RNA
Source: PubMed Central journal article supplement (PMC4081823; doi:10.1371/journal.ppat.1004242), 2014-07-03

Figure S9.

A.

DENV-2 NGC AF038403.1  
 DENV-2 PR1940 GQ398308.1  
 DENV-2 PR5344 GQ398283.1  
 DENV-2 05K3295 EU081177.1  
 DENV-3 05K802 EU081184.1  
 DENV-3 05K4454 EU081222.1  
 KUNV AY274504.1  
 YFV17D X03700.1

C.

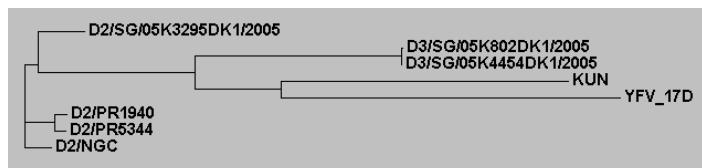

B.

|                       | base stem     | side loop       | Top stem | PK loop              |             |       |
|-----------------------|---------------|-----------------|----------|----------------------|-------------|-------|
| D3/SG/05K802DK1/2005  | AGGCTAACTGT   | CAGGCCACCTTAA   | ----GC   | CACAGTACG--GAAGAAGCT | 10329       |       |
| D3/SG/05K4454DK1/2005 | AGGCTAACTGT   | CAGGCCACCTTAA   | ----GC   | CACAGTACG--GAAGAAGCT | 10329       |       |
| D2/PR1940             | AGGCTAAAAGT   | CAGGTCGGATTAA   | ----GC   | CATAGTACG--GGAAAAACT | 10338       |       |
| D2/PR5344             | AGGCTAAAAGT   | CAGGTCGGATTAA   | ----GC   | CATAGTACG--GGAAAAACT | 10337       |       |
| D2/NGC                | AGGCTAGAAGT   | CAGGTCGGATTAA   | ----GCT  | ATAGTACG--GAAAAAACT  | 10338       |       |
| D2/SG/05K3295DK1/2005 | AAGTCAGAAGT   | CAGGTCGGATTAA   | ----GC   | ATAGTACG--GAAAAAACT  | 10338       |       |
| KUN                   | AGTGAGGAAGT   | CAGGCCGAAAAATTC | CCGC     | ACCGGAAGTTGAGTAGACG  | 10539       |       |
| YFV_17D               | CGGGTGGAGAACC | CGGACTCCCCACA   | ---      | ACCTGAAACC           | GGGATATAAAC | 10437 |

|                       | top stem       | base stem | PK spacer                    |              |
|-----------------------|----------------|-----------|------------------------------|--------------|
| D3/SG/05K802DK1/2005  | GTG-CTG----    | CCTGTGA   | GCCCCGTCCA--AGGAC-----       | GTTA 10361   |
| D3/SG/05K4454DK1/2005 | GTG-CTG----    | CCTGTGA   | GCCCCGTCCA--AGGAC-----       | GTTA 10361   |
| D2/PR1940             | ATG-CTA----    | CCTGTGA   | GCCCCTGCCA--AGGAC-----       | GTTA 10370   |
| D2/PR5344             | ATG-CTA----    | CCTGTGA   | GCCCCTGCCA--AGGAC-----       | GTTA 10369   |
| D2/NGC                | ATG-CTA----    | CCTGTGA   | GCCCCGTCCA--AGGAC-----       | GTTA 10370   |
| D2/SG/05K3295DK1/2005 | GTG-CTA----    | CCTGTGA   | GCCCCGTCCA--AGGAC-----       | GTTA 10370   |
| KUN                   | GTG-CTG----    | CTGCAC    | TCAACCCCAGGAGGACTGG-----     | GTGAAC 10578 |
| YFV_17D               | ACGGCTGGAGAACC | GGGCTCCGC | ACTTAAAATGAAACAGAAACCCGGGATA | 10487        |

D.

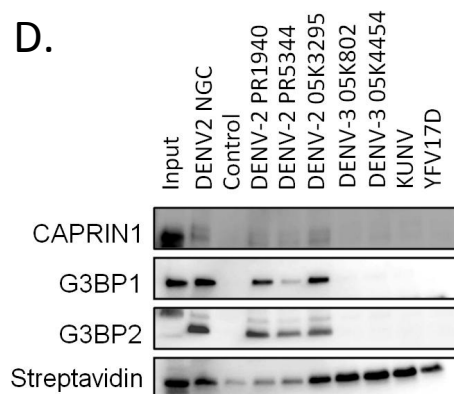

E.

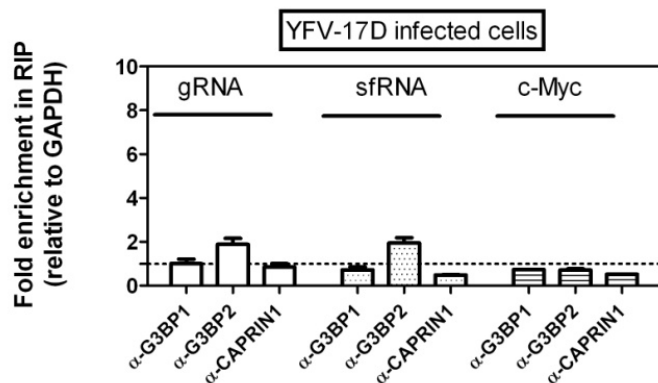

Supplement: ppat.1004242.s009.pdf [file ppat.1004242.s009.pdf]
