# Supplementary material for: G3BP1, G3BP2 and CAPRIN1 Are Required for Translation of Interferon Stimulated mRNAs and Are Targeted by a Dengue Virus Non-coding RNA
Source: PubMed Central journal article supplement (PMC4081823; doi:10.1371/journal.ppat.1004242), 2014-07-03

Figure S5.

A.

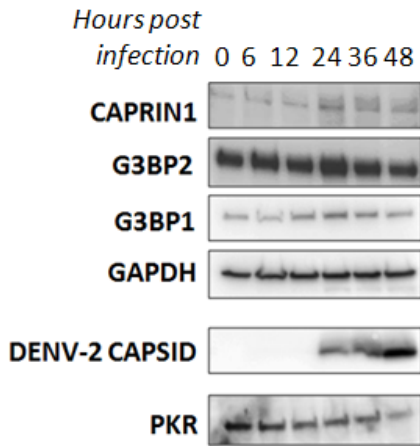

B.

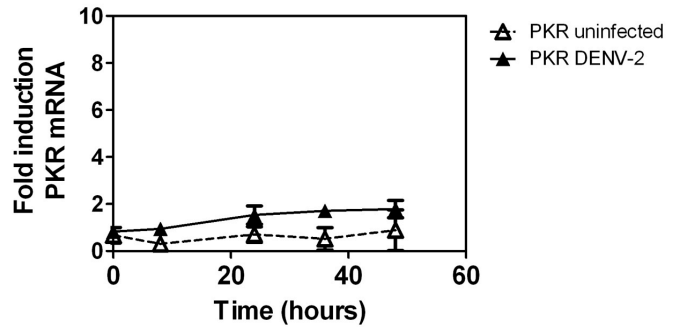

Supplement: ppat.1004242.s005.pdf [file ppat.1004242.s005.pdf]
