# Supplementary material for: G3BP1, G3BP2 and CAPRIN1 Are Required for Translation of Interferon Stimulated mRNAs and Are Targeted by a Dengue Virus Non-coding RNA
Source: PubMed Central journal article supplement (PMC4081823; doi:10.1371/journal.ppat.1004242), 2014-07-03

Figure S7.

A.

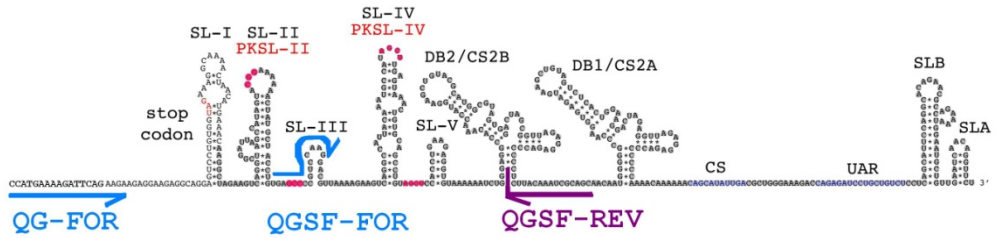

B.

| Primer   | Sequence             | Position    |
|----------|----------------------|-------------|
| QG_For   | CCATGAAAAGATTTCAGAAG | 10201-10219 |
| QGSF_For | GTGAGCCCCGTCCAAGG    | 10326-10342 |
| QGSF_Rev | GCTGCGATTGTAAAGG     | 10494-10510 |

C.

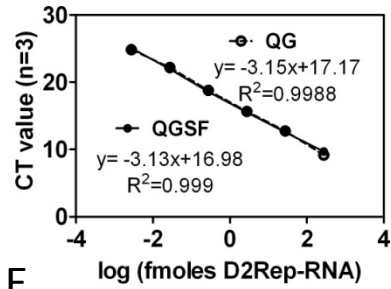

E.

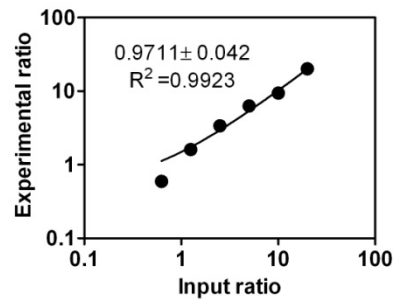

D.

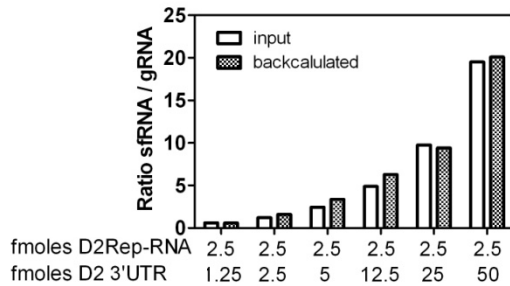

F.

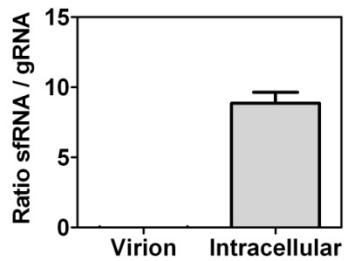

G.

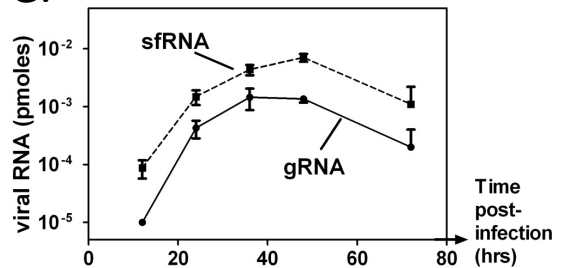

Supplement: ppat.1004242.s007.pdf [file ppat.1004242.s007.pdf]
