# Supplementary material for: G3BP1, G3BP2 and CAPRIN1 Are Required for Translation of Interferon Stimulated mRNAs and Are Targeted by a Dengue Virus Non-coding RNA
Source: PubMed Central journal article supplement (PMC4081823; doi:10.1371/journal.ppat.1004242), 2014-07-03

Figure S12.

A.

|                                               |                                                                                                                   |
|-----------------------------------------------|-------------------------------------------------------------------------------------------------------------------|
| DENV-2_16681_3' UTR<br>DENV-2_16881_dSLII/ST4 | TAGAAAGCAAACCTAACATGAACACRAGGCTAGAAAGTCAGSTCGGATTAAAG<br>TAGAAAGCAAACCTAACATGAACACRAGGCTAGAAAGTCAGG-----<br>..... |
| DENV-2_16681_3' UTR<br>DENV-2_16881_dSLII/ST4 | CCATAGTACGGAAAAAATACTATGCTACCTGTGAGCCCGCTCCRAGGACGTT<br>-----GAGCCCGCTCCRAGGACGTT<br>.....                        |
| DENV-2_16681_3' UTR<br>DENV-2_16881_dSLII/ST4 | AAAGAAGTCAGGCCATCAATAATGCCATAGCTTGAGTAAACTATGCGAGC<br>AAAGAAGTCAGGCCATCAATAATGCCATAGCTTGAGTAAACTATGCGAGC<br>..... |
| DENV-2_16681_3' UTR<br>DENV-2_16881_dSLII/ST4 | CTGTAGCTCCACCTGAGAGGTTGTAATAATCCGGAGGCCACAAACCAT<br>CTGTAGCTCCACCTGAGAGGTTGTAATAATCCGGAGGCCACAAACCAT<br>.....     |
| DENV-2_16681_3' UTR<br>DENV-2_16881_dSLII/ST4 | GGAGGCTGTACGCATGGOSTAGTGGACTAGCGTTAGAGGAGACCCCTCC<br>GGAGGCTGTACGCATGGOSTAGTGGACTAGCGTTAGAGGAGACCCCTCC<br>.....   |
| DENV-2_16681_3' UTR<br>DENV-2_16881_dSLII/ST4 | CTTACAAATCGCAGCAACAAATGGGGCCCAAGGGGAGATGAAGCTGTAGT<br>CTTACAAATCGCAGCAACAAATGGGGCCCAAGGGGAGATGAAGCTGTAGT<br>..... |
| DENV-2_16681_3' UTR<br>DENV-2_16881_dSLII/ST4 | CTCGCTGGAAAGGACTAGAGGTTAGAGGAGACCCCGGAAACAAAAACA<br>CTCGCTGGAAAGGACTAGAGGTTAGAGGAGACCCCGGAAACAAAAACA<br>.....     |
| DENV-2_16681_3' UTR<br>DENV-2_16881_dSLII/ST4 | GCATATTGACGCTGGGAAAGACAGAGATCTCTGCTCTCTCAGCATCA<br>GCATATTGACGCTGGGAAAGACAGAGATCTCTGCTCTCTCAGCATCA<br>.....       |
| DENV-2_16681_3' UTR<br>DENV-2_16881_dSLII/ST4 | TTCCAGGCACAGAACGCCAGAAATGSAATGGTCTGTTGAATCAACAGG<br>TTCCAGGCACAGAACGCCAGAAATGSAATGGTCTGTTGAATCAACAGG<br>.....     |
| DENV-2_16681_3' UTR<br>DENV-2_16881_dSLII/ST4 | TTCT<br>TTCT<br>....                                                                                              |

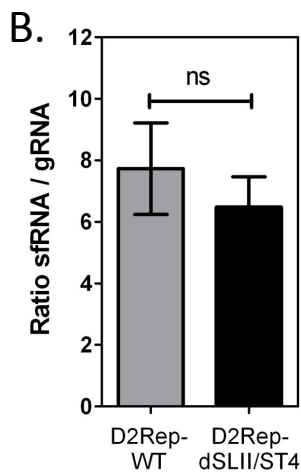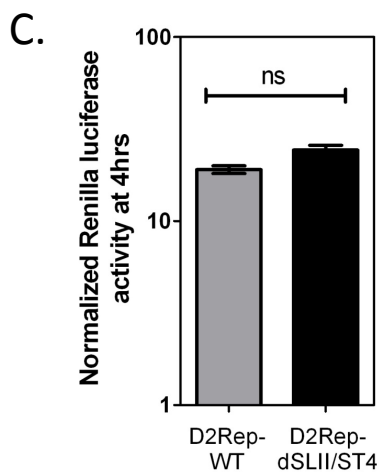

Supplement: ppat.1004242.s012.pdf [file ppat.1004242.s012.pdf]
